1 **PID1 alters antilipolytic action of insulin and increases lipolysis via Inhibited the activation of**

2 **AKT/PKA Pathway**

3 Chunyan Yin, Yan Jin, Yuesheng Liu, Li Wang, Yanfeng Xiao\*

4 Author Affiliations

5 The Second Affiliated Hospital of Xi'an Jiaotong University, Xi'an, Shan Xi 710049, People's

6 Republic of China.

7 **Short title:**PID1 Promotes Lipolysis

8 \* Corresponding author: Yanfeng Xiao, Department of pediatrics, The Second Affiliated Hospital of

9 Xi'an Jiaotong University, Xi'an, ShanXi 710049, People's Republic of China. Tel: +86-029-

10 87679543. Fax: 860298767542. E-mail: xiaoyanfenggroup@sina.com.

11 **ABSTRACT**

12 **Purpose:** The aim was to investigate the mechanism for impaired control of lipolysis in obesity by

13 investigating the effect of PID1 on insulin-induced activation of AKT/PKA/HSL pathway and

14 lipolysis. **Methods:** First, PID1 expression was detected in adipose tissue and blood insulin and

15 glycerol levels were measured in high-fat diet-induced obese rats. Next, we examined the effect of

16 different concentrations of insulin on lipolysis and AKT/PKA/HSL pathway in 3T3-L1 cells. We also

17 investigated the role of PID1 in regulating AKT/PKA/HSL cascade and lipolysis after insulin treatment

18 and lipofectamine over-expression. **Results:** PID1 expression is increased in adipose tissue from HFD

19 rat and positive correlation with insulin levels and lipolysis. In 3T3-L1 adipocytes, we found that

20 antilipolytic effect of insulin is mediated by AKT and AKT activated by insulin can results in

21 phosphorylation of PKA and HSL and suppresses glycerol release. However, over-expression of PID1

22 counteracts insulin action as indicated by glycerol release and reduced level of Akt phosphorylation in

23 accordance with a decrease in the activity of insulin-dependent PKA/HSL signaling cascade.

24 **Conclusions:** All together, these data showed that activation of PID1 in adipose tissue increases

25 lipolysis by altering the antilipolytic action of insulin. This suggests that PID1 may constitute a new

26 strategy to ameliorate adipocyte lipolysis and hence to improve insulin sensitivity.

27 **Key words:** PID1; insulin; antilipolytic effect; lipolysis; AKT Pathway

## 28 **Introduction**

29 Obesity is an increasing global health problem that is usually accompanied by insulin resistance and type  
30 2 diabetes. Elevated serum FFA levels are frequently present in obesity and there is substantial evidence  
31 implicating elevated free fatty acid levels as a consequence of inappropriate lipolysis as a major  
32 etiological factor for insulin resistance and type 2 diabetes mellitus (T2DM) [1-2]. Thus,  
33 understanding in detail the mechanism by which the impaired insulin suppresses fat cell lipolysis is  
34 critical to identifying the underlying defect in resistant adipose tissue and ultimately developing  
35 effective therapeutics.

36 As it is well known, insulin, an important hormone for regulating glucose metabolism, is also a key  
37 hormone promoting lipogenesis and inhibiting lipolysis [3]. The antilipolytic effect of insulin has been  
38 proposed to involve the reduction of cAMP levels and thus PKA activity. In this model, insulin  
39 signaling activates phosphodiesterase 3b (PDE3b) via the Akt-mediated phosphorylation of Ser273 [4,  
40 5]. The activation of PDE3B catalyzes the hydrolysis of cAMP and leads to lowering of the cellular  
41 level of cAMP. The lowering of cAMP further inhibits protein kinase A (PKA) activity and thereby a  
42 decrease hormone sensitive lipase and lipolysis [6], but recent results show that, PDE3B activities in  
43 obese patients were significantly reduced in adipose tissue [7]. Thus, decreased AKT/PDE3B pathway  
44 activity may be a contributing factor to the diminished antilipolytic effect of insulin in obese patients.

45 PID1 were subtracted from normal-weight subjects using suppression subtractive hybridization  
46 (SSH) [8]. Guo et al found that PID1 which contain a phosphotyrosine binding (PTB) domain can bind  
47 to phosphorylated tyrosine residues and impair insulin signal transduction. And increased expression of  
48 PID1 leads to a reduction in insulin-stimulated glucose uptake and impaired insulin-stimulated  
49 GLUT4 translocation in mature adipocytes [9], but whether PID1 also influences signaling pathway of

50 insulin regulates lipid metabolism still needs to be confirmed by further investigations.

51 In this study, we examined the effects of PID1 on lipolysis in high-fat diet (HFD)-induced obese rats,  
52 and further investigated the potential molecular mechanism underlying these effects using 3T3-L1  
53 cells. We present evidence that PID1 alters antilipolytic action of insulin by inhibiting the AKT/PKA  
54 pathway which was activated by insulin and lead to lipolysis in obese.

## 55 **Methods**

### 56 Animal care and treatments

57 Ninety-six and 3-wk-old male SD rats were individually housed in a humidity controlled room with 12  
58 h light/dark cycle. All the rats consumed a commercial diet for 1 week. After that, animals were  
59 randomized into two dietary groups according to ratio of 1:2: chow (36, CH, 12% kcal fat) or high fat  
60 (72, HF, 60% kcal fat). Eight normal diet rats and sixteen fat diet rats were randomly selected and body  
61 weights were measured at the following time points: 8, 16, 20, and 24w. The experimental protocols  
62 were approved by the Animal Care and Protection Committee of Xi'an Jiao tong University.

### 63 Blood chemistries

64 All rats were killed and samples of blood were collected to measure insulin and glycerol by ELISA  
65 (Sigma) at 8, 16, 20 and 24w. Enzymatic assay kits (Applygen) were used for the determination of  
66 serum glucose. Samples of adipose tissue were collected to detect PID1 immunohistochemistry.

### 67 Immunohistochemistry

68 Rat adipose tissue were fixed with 4% paraformaldehyde and embedded in paraffin, and 5 $\mu$ m-sections  
69 were prepared. After paraffin removal, tissue sections were stained with insulin and PID1  
70 antibody(Abcam).

### 71 Cell culture

72 3T3-L1 were cultured in flasks (25 cm<sup>2</sup>) in phenol red-free Dulbecco's modified Eagle's medium.

73 Differentiation was induced using described protocols [10]. When more than 90% cells were fully

74 differentiated, cells were treated with varying insulin doses (1-100nmol/L). To block PKA pathway, the

75 inhibitor of PKA (H-89) was treated 12 h after the exposure to 100nM insulin for 24h, then culture

76 medium and cells were separated and stored.

77 Lipolysis measurement

78 An aliquot of the media (400µl) was collected, and glycerol release in cell culture medium was

79 determined by using a colorimetric method (Sigma). The amount of glycerol was normalized to protein

80 concentration as an index of lipolysis.

81 Immunofluorescence

82 3T3-L1 cells were cultured and differentiated on coverslips, then fixed with 4% paraformaldehyde for

83 20 min, permeabilized with 0.05% Triton X-100 in PBS (15min), and blocked with 5% BSA in PBST

84 (1h at room temperature). Staining with PID1 antibody was followed by incubation with Alexafluor

85 (488)-conjugated secondary antibodies(Jackson), then stained with 0.2µg/mL Nile Red (Sigma) for 5

86 min, and incubated with 0.1µg/mL DAPI for 2 min.

87 Immunoblot

88 Cells were lysed ice-cold RIPA buffer. After protein concentration had been measured, the samples

89 were mixed with Laemmli sample buffer and subjected to polyacrylamide gel electrophoresis

90 (PAGE)(10% acrylamide) and Western blot analysis. After the electro transfer of proteins onto a PVDF

91 membrane (Millipore), membranes were incubated overnight at 4°C with continual motion, using

92 specific primary antibodies (AKT, p-AKT, PKA, p-PKA, HSL, p-HSL). Detection of protein-antibody

93 immune complexes was achieved using horseradish peroxidase-conjugated secondary antibodies

94 diluted 1:10000 in PBS with 0.05% Tween. The chemo luminescent signal was analyzed and quantified  
95 with use of the bio-rad system.

96 PID1 over-expression construct and transfection

97 The coding sequence of PID1 was subcloned into the pcDNA3.1Myc/His Bvector to generate a plasmid  
98 expressing PID1 His fusion protein. Expression vectors carrying the PID1 coding sequence or empty  
99 vectors were transfected into differentiated 3T3-L1 using Lipofectamine 2000. Two days after  
100 transfection, 0.8 mg/ml G418 (Roche, Basel, Switzerland) was added to the medium to select for  
101 transfected cells. Drug-resistant cells began to form small colonies after two weeks of G418 addition.  
102 Individual colonies were isolated, propagated and PID1 was identified by RT-PCR.

103 RNAi

104 Differentiated adipocytes were transfected with 30 nM siRNA targeting AKT with Turbofect (Thermo  
105 Scientific) according to the manufacturer's instructions. The knockdown efficiency was evaluated by  
106 RT-PCR and Western blot analysis.

107 Statistical analysis

108 Normal distributions were assessed by the Kolmogorov–Smirnov test. Results are expressed as  
109 means±SE. Comparisons between groups were assessed using t-test or one-way ANOVA with post hoc  
110 Bonferroni corrections as appropriate. Differences were considered significant at  $P < 0.05$ .

## 111 **Results**

### 112 **Changes of body weights and adipose tissue weights**

113 The body weights (BWs) for high fat diet (HFD) rats and normal diet (ND) rats were measured weekly.  
114 Initial mean BWs of the 2 groups did not differ significantly. At week 8, HFD groups had significantly  
115 higher BWs than ND groups, and the BWs remained higher throughout the 24-week dietary

116 period(Figure. 1a). Similarly, after 8 weeks, epididymal and perirenal fat depot weights in HFD groups  
117 were heavier than that of ND groups (Figure. 1b), reflecting the high fat diet increased body fat  
118 content.

### 119 **Serum glucose, insulin and glycerol levels in HFD and ND groups**

120 After 20 weeks of the diet, the glycerol values for the HFD groups were significantly increased  
121 compared with ND groups (Figure 1d). The same differences for insulin levels were also observed after  
122 20 weeks of the diet, with a further increase in high fat diet feeding period (Figure 1c), whereas there  
123 were no significant differences in serum glucose levels throughout the 24-week dietary period (Figure  
124 1e), suggesting a difference in the metabolic response to the diet between the 2groups. Moreover, there  
125 was a good correlation in all 2 groups between insulin and glycerol ( $r=0.57$ ,  $P<0.05$ ). Since glycerol  
126 was an indicator reflecting the lipolysis, we hypothesized that antilipolytic effect of insulin was  
127 impaired in HFD rats.

### 128 **The levels of Insulin binding to white adipose tissue (WAT)**

129 After 20 weeks of HFD feeding, serum insulin levels of HFD groups was significantly increased  
130 compared with ND groups. To assess whether high blood insulin in HFD groups have an effect on  
131 insulin receptor of adipose tissue. We further measured the levels of insulin bound to receptor of  
132 adipose tissue in 2 groups of rats by using immunohistochemistry at 8, 16, 20, and 24 weeks. The results  
133 showed no differences among 2 groups after 8 and 16 weeks of the diet. However, after 20 and 24 weeks  
134 of HFD feeding, insulin bound to the receptor was respectively increased 2.1-fold and 3.8-fold in HFD  
135 groups compared with ND groups (Figure 1g-f). The result parallels the increase in blood insulin  
136 observed in HFD groups versus the ND groups.

### 137 **Expression of PDK1 in WAT**

138 We also examined whether the expression of PID1 were altered in WAT of HFD groups compared  
139 with ND groups. After 20 weeks of the diet, protein expression of PID1 exhibited a significantly  
140 increased in HFD groups compared with ND groups. After 24 weeks of the HFD feeding,  
141 PID1 expression in HFD groups showed a further increased compared with those on the 20-week diet  
142 and was significantly higher than that for ND groups (Figure 1g, h), Furthermore, there were positive  
143 correlations between PID1 and glycerol levels in 2 groups ( $r=0.42$ ,  $P<0.05$ ), suggesting that PID1 may  
144 play a role in lipolysis.

#### 145 **Insulin suppresses glycerol release in 3T3-L1 via activation of Akt signaling Pathway**

146 To study the effect of insulin on lipid metabolism using 3T3-L1 cell lines. After 3T3-L1 cells were fully  
147 differentiated, we started off examining dose-dependent effects of insulin in adipocyte lipolysis.  
148 In accordance with previous studies [11], we found that insulin produced a concentration dependent  
149 decrease in glycerol release with significant elevation detectable at 100 nM insulin (Figure 2a, d), and  
150 the intracellular lipids increased as insulin dose increased.

151 We also detected whether Akt were required for insulin's suppression of lipolysis. when adipocytes  
152 were fully differentiated, cells were treat with 1, 10 and 100nM insulin for 24 h. As expected, insulin  
153 dose-dependently induced phosphorylation of AKT in 3T3-L1 cell lines. As insulin significantly  
154 decreased glycerol release and activated AKT expression at the concentration of 100nM (Figure 2a,b),  
155 we used this concentration in the following experiments. Differentiated adipocytes were transfected  
156 with AKT siRNA, incubated in the presence of 100nM insulin. AKT siRNA transfection led to >80%  
157 knockdown of the target genes and increased glycerol release in 3T3-L1 (Figure 3b,c). These results  
158 suggest that antilipolytic effect of insulin is mediated by AKT in 3T3-L1 adipocytes.

#### 159 **Effect of activation on the insulin induced decrease in PKA and HSL**



160 Because the current view holds that insulin signaling inhibits lipolysis by reducing PKA and HSL  
161 activity [18]. Firstly, we assessed whether insulin inhibits lipolysis via affected the phosphorylation of  
162 PKA and known PKA substrates. Secondly, we assessed how siRNA knockdown of AKT or treatment  
163 with PKA inhibitors affected the phosphorylation of PKA and HSL. After the addition of different  
164 doses of insulin, we analyzed the phosphorylation of HSL at its major PKA site and observed the  
165 phosphorylation of PKA. We observed that PKA and HSL phosphorylation levels were significantly  
166 reduced on insulin exposure (Figure 2b, c). On the other hand, the AKT siRNA partially reversed the  
167 inhibition of PKA and HSL phosphorylation by insulin treatment (Figure 3a,b). Western blot analysis  
168 showed that PKA inhibitors pretreatment also dose-dependently reversed the inhibitory effect of insulin  
169 on HSL and glycerol release in 3T3-L1(Figure 3d, e). These data confirm that AKT activated by  
170 insulin can results in phosphorylation of PKA and HSL and suppresses glycerol release in 3T3-L1.

171 **Effects of PID1 over-expression on lipolysis and phosphorylation of AKT/PKA/HSL signaling**  
172 **molecules**

173 To understand the underlying mechanisms by which PID1 affected lipid metabolism, we investigated  
174 the effect of PID1 on lipolysis and the proteins involved in insulin signaling inhibits lipolysis.  
175 Differentiated adipocytes were transfected with PID1 plasmids, incubated in the presence of 100nM  
176 insulin. And then we examined the effects of PID1 over-expression on the lipolysis response to  
177 insulin. Glycerol release was approximately 40% higher in PID1-overexpressing cells than in control  
178 cells(Figure 4e). Additionally, PID1 over-expression resulted in noticeable inhibition of insulin-  
179 induced Akt serine phosphorylation(Figure 4 c-d). We also evaluated the phosphorylation of the PKA  
180 and HSL, which are downstream signaling molecules of the AKT in insulin antilipolytic signaling  
181 pathway. We found that PKA and HSL phosphorylation levels were significantly increased in PID1

182 over-expression cells (Figure 4c-d). This indicates that PID1 inhibits insulin antilipolytic signaling  
183 pathway, which involves the inhibition of AKT phosphorylation.

#### 184 **Discussion**

185 Our animal experiments show that PID1 expression is increased in adipose tissue from HFD rat and  
186 positive correlation with insulin levels and lipolysis. Mechanistically, in 3T3-L1 adipocytes, we found  
187 that antilipolytic effect of insulin is mediated by AKT and AKT activated by insulin can results in  
188 phosphorylation of PKA and HSL and suppresses glycerol release. However, over-expression of PID1,  
189 via inhibiting of insulin-induced activation of AKT, leads to activating phosphorylation of PKA/HSL  
190 cascade and promotes lipolysis.

191 The levels of circulating FFA depend primarily on the rates of lipolysis in the adipose tissue. One of  
192 the key physiological functions of insulin as the major anabolic hormone in the body is to restrain  
193 lipolysis and to promote fat storage in adipose tissue in the postprandial state[12, 13]. In vitro  
194 experiments, we found that insulin activated AKT expression levels in dose-dependent manner, in  
195 parallel with decreased glycerol release and increased lipid droplet size. PKA/HSL cascade  
196 phosphorylates a wealth of proteins to exert variousbiological functions in different cell types. In  
197 adipocytes, this pathway mediates lipolytic effects of several hormones[14, 15]. We showed that AKT  
198 depletion activated PKA and HSL phosphorylation and ameliorated the inhibitory action of insulin on  
199 lipolysis. PKA inhibitors pretreatment also dose-dependently reversed the inhibitory effect of insulin  
200 on HSL and glycerol release. Our data with regard to the mechanism by which insulin inhibits lipolysis  
201 are consistent with previous studies, which showed that the inhibitory effect of insulin on lipolysis is  
202 attributed primarily to the inhibition of cAMP-mediated signaling to HSL via Akt-dependent [16, 17].

203 There are considerable data implicating a defect in antilipolysis as a critical etiological abnormality

204 initiating the positive amplifying circuit that characterizes insulin resistance [18, 19]. However, the  
205 molecular mechanism by which impaired control of lipolysis in obesity is still unknown at this time.  
206 PID1 which contains a phosphotyrosine binding (PTB) domain were subtracted from normal-weight  
207 subjects using suppression subtractive hybridization (SSH)[20-22]. The PTB domain usually binds to  
208 phosphorylated tyrosine residues and functions in signal transduction by growth factor receptors [23]. In  
209 adipocytes and muscle cells, PID1 also inhibits insulin-mediated phosphorylation of IRS-1, and insulin-  
210 mediated translocation of the GLUT-4 glucose transporter to the membrane, resulting in decreased  
211 glucose uptake [24, 25]. Therefore, we hypothesize that the PTB domain of PID1 might impair tyrosine  
212 phosphorylation of insulin signaling molecules that inhibit lipolysis. In vivo experiments, PID1  
213 expression is increased in adipose tissue from HFD rat and positive correlation with insulin levels and  
214 lipolysis. Consistently, other studies also showed that adipose PID1 expression increased in obesity  
215 [26]. Meanwhile, we noticed that over-expression of PID1 significantly increased lipolysis in 3T3-L1  
216 cells. To further investigate the molecular mechanism by which PID1 increases lipolysis, we examined  
217 the levels and phosphorylation of proteins involved in insulin signaling for lipid metabolism. The  
218 results showed that PID1 decreased the insulin-stimulated serine phosphorylation of Akt, and PKA and  
219 HSL phosphorylation levels were significantly increased in PID1 over-expression cells. Based on the  
220 results, we concluded that over-expression of PID1 promotes lipolysis in 3T3-L1 adipocytes mainly  
221 through blocking the AKT/PKA /HSL insulin pathway.

## 222 **Conclusion**

223 In conclusion, our results demonstrate that PID1 over-expression promotes lipolysis in vitro by  
224 attenuating the AKT/PKA /HSL insulin pathway. From in vivo observation to molecular mechanism  
225 studies, our results show that activation of PID1 in adipose tissue increases lipolysis by altering the

226 antilipolytic action of insulin. It is believed that impaired control of lipolysis in obesity, which  
227 increases circulating FFAs, leads to systemic insulin resistance. Therefore, elucidating the mechanism  
228 of PID1-induced lipolysis may constitute a new strategy to ameliorate adipocyte lipolysis and hence to  
229 improve insulin sensitivity.

230 **Funding statement:** This work was supported by the Nature Science Foundation of China No.  
231 81172689.

232 **Conflict of interest:** No potential conflicts of interest relevant to this article were reported.

### 233 **Reference**

234 [1]Kahn S E, Hull R L, Utzschneider K M. Mechanisms linking obesity to insulin resistance and type 2  
235 diabetes. *Nature*. 2006; 444(7121): 840-846.

236 [2]Romeo G R, Lee J, Shoelson S E. Metabolic syndrome, insulin resistance, and roles of  
237 inflammation—mechanisms and therapeutic targets. *Arteriosclerosis, thrombosis, and vascular biology*.  
238 2012; 32(8): 1771-1776.

239 [3]Carmen G Y, Victor S M. Signalling mechanisms regulating lipolysis. *Cellular signaling*. 2006;  
240 18(4): 401-408.

241 [4]McTernan P G, Harte A L, Anderson L A, et al. Insulin and rosiglitazone regulation of lipolysis and  
242 lipogenesis in human adipose tissue in vitro. *Diabetes*. 2002; 51(5): 1493-1498.

243 [5]Omar B, Banke E, Ekelund, Frederiksen, Degerman E: Alterations in cyclic nucleotide  
244 phosphodiesterase activities in omentaland subcutaneous adipose tissues in human obesity. *Nutr*  
245 *Diabetes*. 2011; 1:e13

246 [6]Francis SH, Blount MA, Corbin JD: Mammalian cyclic nucleotide phosphodiesterases: molecular  
247 mechanisms and physiological functions. *Physiol Rev*. 2011; 91:651-690.

- 248 [7]Johnson JA, Fried SK, Pi-Sunyer FX, Albu JB: Impaired insulin action in subcutaneous adipocytes  
249 from women with visceral obesity. *Am J Physiol Endocrinol Metab.* 2001;280:E40-E49.
- 250 [8]Qiu J, Ni YH, Gong HX, Fei L, Pan XQ, Guo M, et al. Identification of differentially expressed  
251 genes in omental adipose tissues of obese patients by suppression subtractive hybridization. *Biochem*  
252 *Biophys Res Commun.* 2007; 352(2):469-78.
- 253 [9]Duehlmeier R, Hacker A, Widdel-Bigdely A, et al. Insulin stimulates GLUT4 translocation in the  
254 semitendinosus muscle of Shetland ponies. *The Veterinary Journal.* 2010; 184(2): 176-181.
- 255 [10] Zeng X Q, Zhang C M, Tong M L, et al. Knockdown of NYGGF4 increases glucose transport in  
256 C2C12 mice skeletal myocytes by activation IRS-1/PI3K/AKT insulin pathway. *Journal of*  
257 *bioenergetics and biomembranes.* 2012; 44(3): 351-355.
- 258 [11]Wang B, Zhang M, Ni YH, Liu F, Fan HQ, Fei L, et al. Identification and characterization of  
259 NYGGF4, a novel gene containing a phosphotyrosinebinding(PTB) domain that stimulates 3T3-L1  
260 preadipocytes proliferation. *Gene.* 2006; 379:132-40.
- 261 [12]Omori K, Kotera J. Overview of PDEs and their regulation. *Circulation research.* 2007; 100(3):  
262 309-327.
- 263 [13]Zmuda-Trzebiatowska E. The role of PDE3B in energy metabolism. *ASSAY and Drug*  
264 *Development Technologies.* 2008; 6(3): 461-463.
- 265 [14] Goossens G H. The role of adipose tissue dysfunction in the pathogenesis of obesity-related  
266 insulin resistance. *Physiology & behavior.* 2008; 94(2): 206-218.
- 267 [15]Karpe F, Dickmann J R, Frayn K N. Fatty acids, obesity, and insulin resistance: time for a  
268 reevaluation. *Diabetes.* 2011; 60(10): 2441-2449.
- 269 [16]Ghibaudi L, Cook J, Farley C, van Heek M, Hwa JJ. Fat intake affects adiposity, comorbidity

- 270 factors, and energy metabolism of Sprague-Dawley rats. *Obesity Research*. 2002; 10 (9), 956–963.
- 271 [17] Bray GA, Paeratakul S, Popkin BM. Dietary fat and obesity: a review of animal, clinical and  
272 epidemiological studies. *Physiology & Behavior*. 2004; 83(4): 549-555.
- 273 [18]Korenblat K M, Fabbrini E, Mohammed B S, et al. Liver, muscle, and adipose tissue insulin action  
274 is directly related to intrahepatic triglyceride content in obese subjects *Gastroenterology*. 2008; 134(5):  
275 1369-1375.
- 276 [19]Fabbrini E, DeHaseh D, Deivanayagam S, et al. Alterations in fatty acid kinetics in obese  
277 adolescents with increased intra hepatic triglyceride content. *Obesity*. 2009; 17(1): 25-29.
- 278 [20]Ebbert J O, Jensen M D. Fat depots, free fatty acids, and dyslipidemia. *Nutrients*. 2013; 5(2): 498-  
279 508.
- 280 [21]Degerman E, Ahmad F, Chung Y W, et al. From PDE3B to the regulation of energy homeostasis.  
281 *Current opinion in pharmacology*. 2011; 11(6): 676-682.
- 282 [22]Arner P. Human fat cell lipolysis: biochemistry, regulation and clinical role. *Best practice &*  
283 *research Clinical endocrinology & metabolism* . 2005; 19(4): 471-482.
- 284 [23]Wueest S, Rapold R A, Rytka J M, et al. Basal lipolysis, not the degree of insulin resistance,  
285 differentiates large from small isolated adipocytes in high-fat fed mice. *Diabetologia*. 2009; 52(3): 541-  
286 546.
- 287 [24]Choi S M, Tucker D F, Gross D N, et al. Insulin regulates adipocyte lipolysis via an Akt-  
288 independent signaling pathway. *Molecular and cellular biology*. 2010; 30(21): 5009-5020.
- 289 [25]Wu WL, Gan WH, Tong ML, Li XL, Dai JZ, Zhang CM, et al. Over-expression of NYGGF4  
290 (PID1) inhibits glucose transport in skeletal myotubes by blocking theIRS1/PI3K/AKT insulin  
291 pathway. *Mol Genet Metab*. 2011; 102(3):374-7.

- 292 [26] Zhang CM, Chen XH, Wang B, Liu F, Chi X, Tong ML, et al. Over-expression of NYGGF4  
293 inhibits glucose transport in 3T3-L1 adipocytes via attenuated phosphorylation of IRS-1 and Akt. Acta  
294 Pharmacol Sin. 2009; 30(1):120-4.

295 Figure 1. Measures of body weight, total fat, insulin, glycerol and blood glucose of Sprague-Dawley  
296 rats fed either a chow or high-fat diet at 8, 16, 20, and 24weeks, and detection the expression of insulin  
297 bound to receptor and PID1 in WAT. (a)Body weight. (b)Total fat. (c)Plasma levels of insulin. (d)  
298 Plasma levels of glycerol. (e) Plasma levels of glucose. (f) Density of insulin bound to the receptor. (g)  
299 Immunostaining of insulin bound to receptor and PID1 in WAT. (h) Density of PID1.Values represent  
300 mean  $\pm$ SE, \*  $P < 0.05$  compared with ND; \*\* $P < 0.01$  compared with ND.

301 Figure 2. Insulin inhibits lipolysis via AKT/PKA/HSL pathway in 3T3-L1 adipocytes. Differentiated  
302 3T3-L1 adipocytes were treated with insulin at different doses (1-100nM). (a) Cellular triglycerides  
303 were measured by oil red O staining.(b-c) Protein expression of AKT, phosphorylated AKT (P-AKT),  
304 PKA, phosphorylated PKA (P-PKA), HSL and phosphorylated HSL (P-HSL) were determined by  
305 western blot. (d)Glycerol released into medium. \* $P < 0.05$  vs. untreated cells; \*\* $P < 0.01$  vs. untreated  
306 cells.

307 Figure 3.The effects of depletion of AKT or PKA on insulin regulates lipolysis. Differentiated  
308 adipocytes were transfected with AKT siRNAortreated with PKA inhibitor, incubated in the presence  
309 of 100nMinsulin. (a) Effects of AKT siRNA on insulin induced PKA and HSL protein activation. (b)  
310 Relative protein expression of AKT, PKA, phosphorylated PKA (P-PKA), HSL and phosphorylated  
311 HSL transfected with AKT siRNA in 3T3-L1 adipocytes. (c) Glycerol released into medium after  
312 transfecting with siRNA targeting AKT. (d) Effects of PKA inhibitors on insulin induced HSL protein  
313 reduction. (e) Relative protein expression of HSL and phosphorylated HSL treated with PKA inhibitor  
314 in 3T3-L1 adipocytes. (f) Glycerol released into medium after treating with PKA inhibitor. \* $P < 0.05$ ;  
315 \*\* $P < 0.01$ .

316 Figure 4. Effects of PID1 over-expression on lipolysis and phosphorylation of AKT/PKA/HSL



317 signaling molecules. Differentiated adipocytes were transfected with PID1 plasmids, incubated in the  
318 presence of 100nM insulin.(a-b)Immunofluorescence analysis was performed to confirm the expression  
319 of PID1 gene in empty vectors cells, PID1-overexpressing cells, and control cells. (c-d) Effects of  
320 PID1overexpression on AKT, phosphorylated AKT (P-AKT), phosphorylated PKA (P-PKA), HSL and  
321 phosphorylated HSL protein expression. (e) Effects of PID1 over expression on lipolysis. \*P<0.05;  
322 \*\*P<0.01.

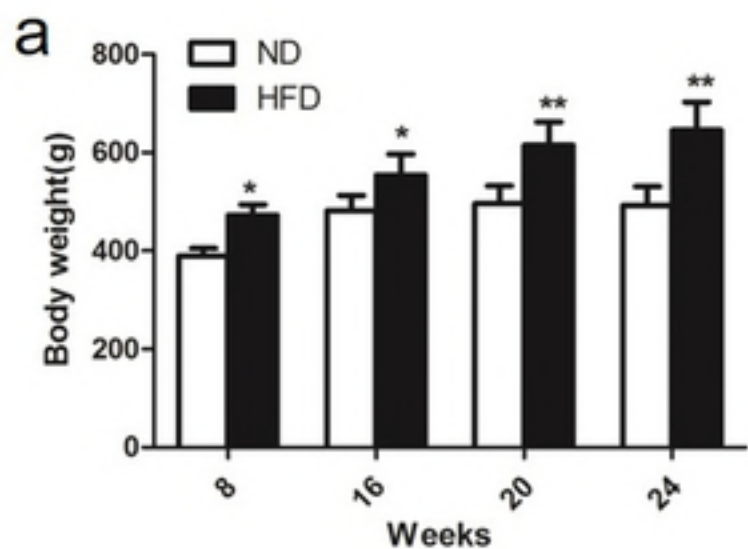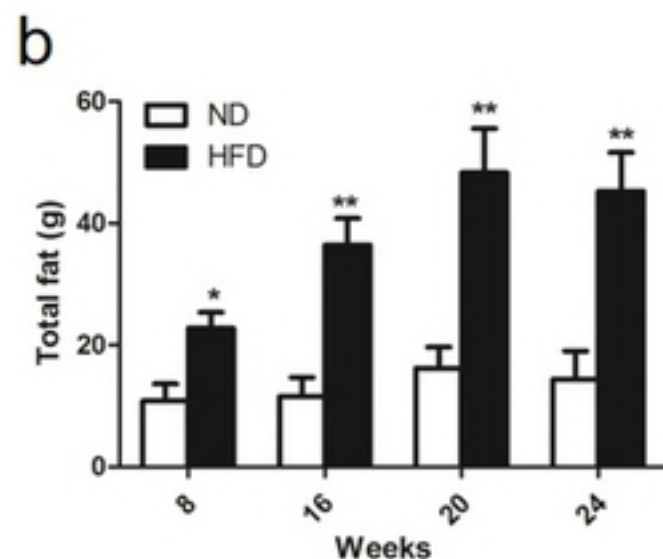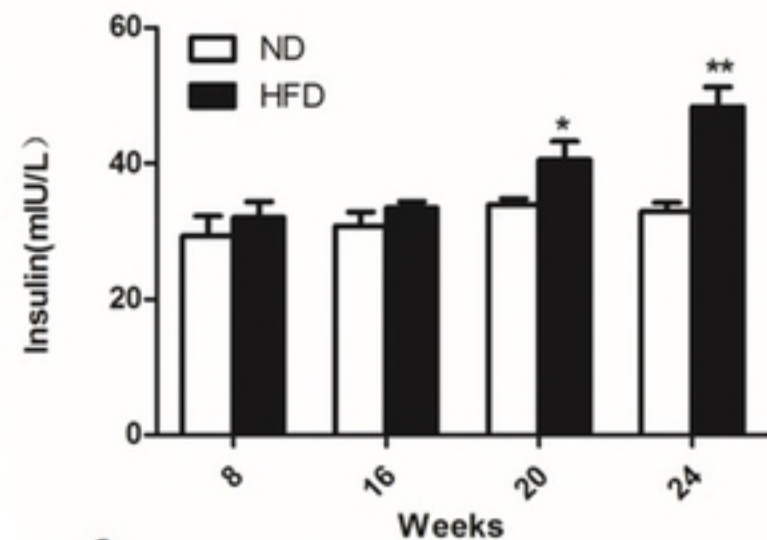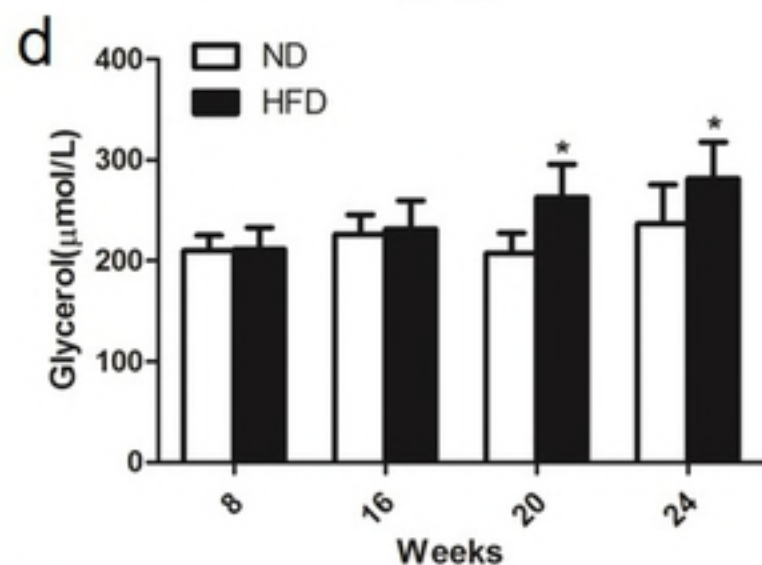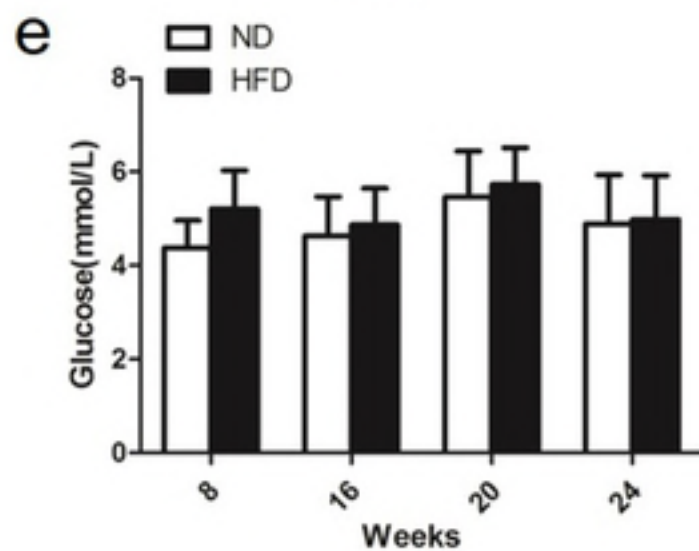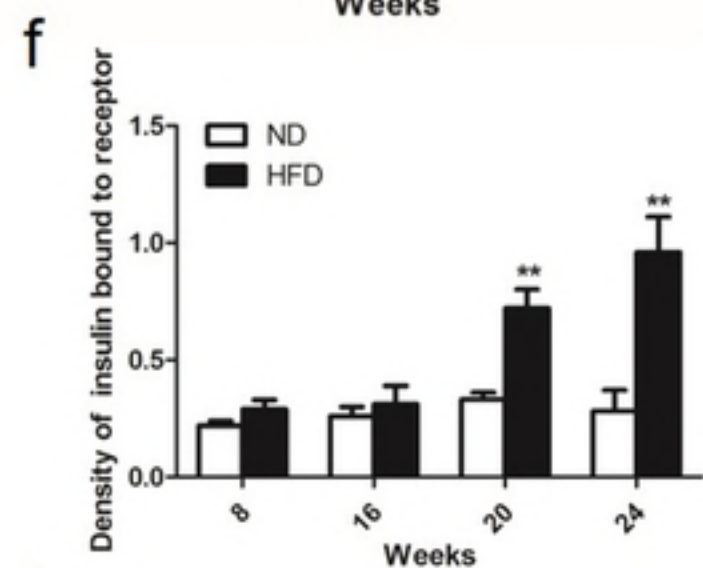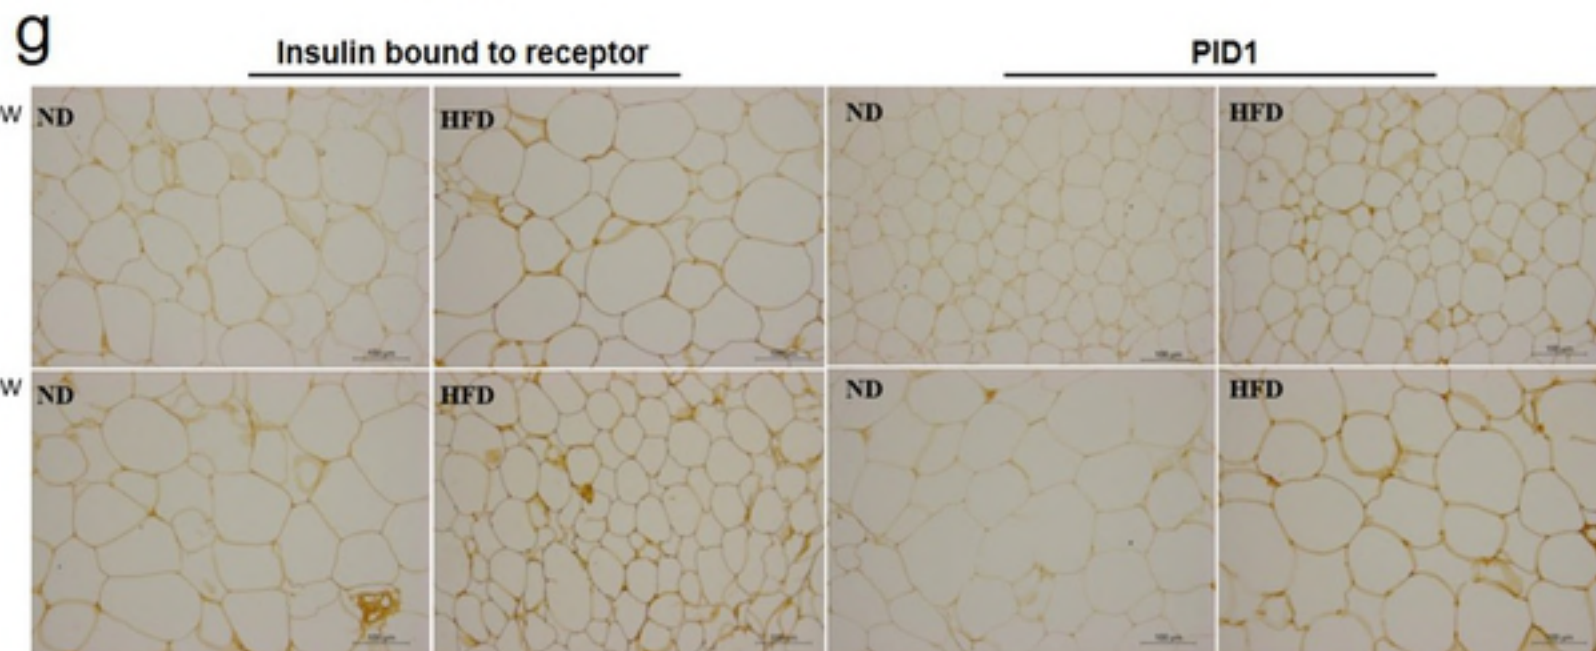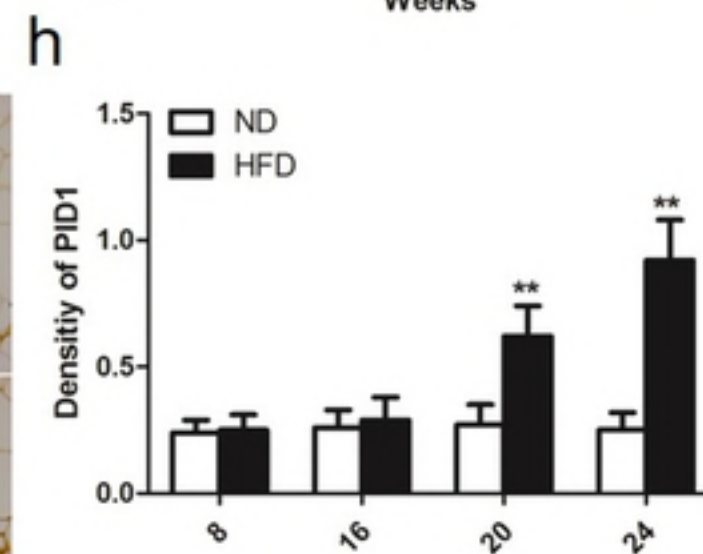

**a**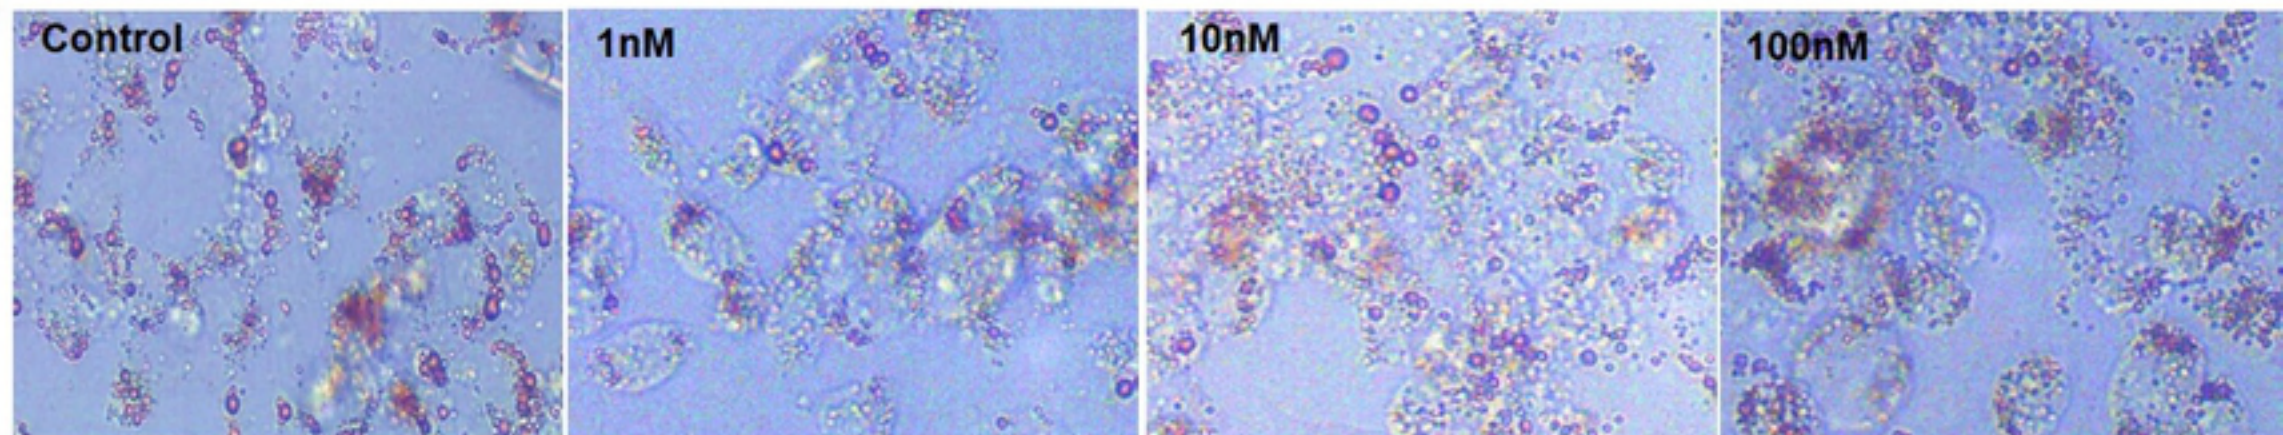**b**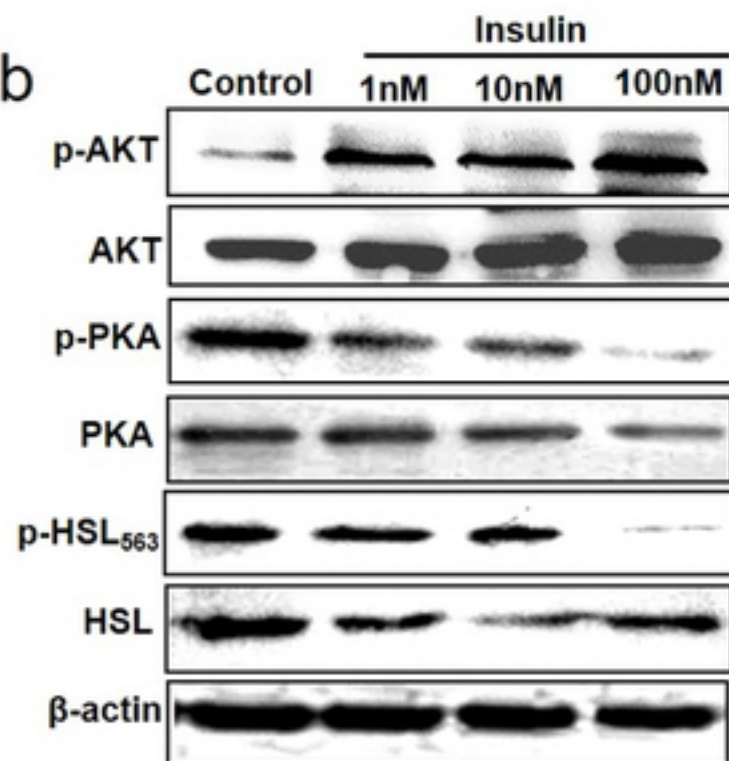**c**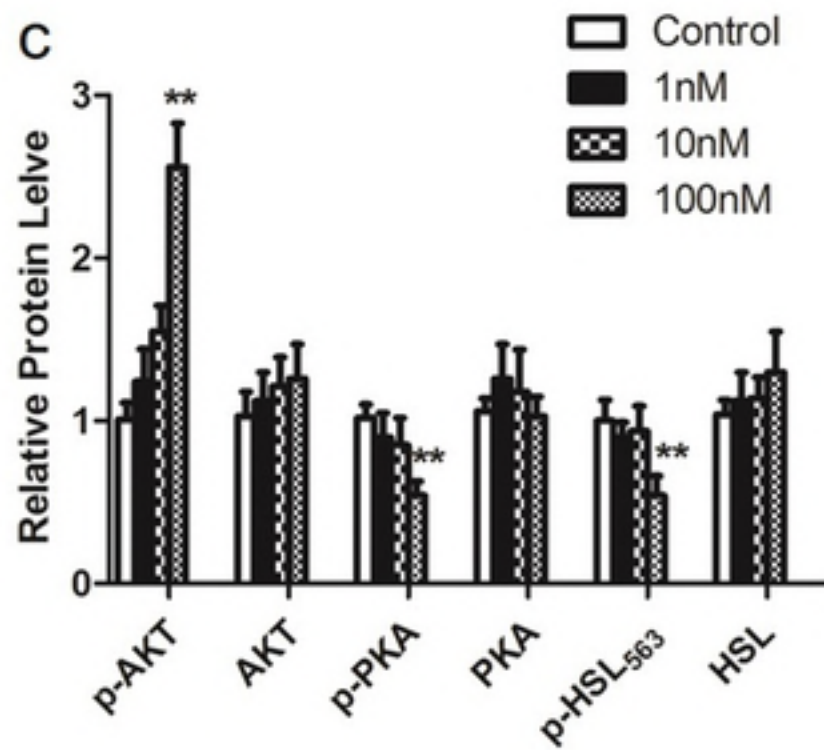**d**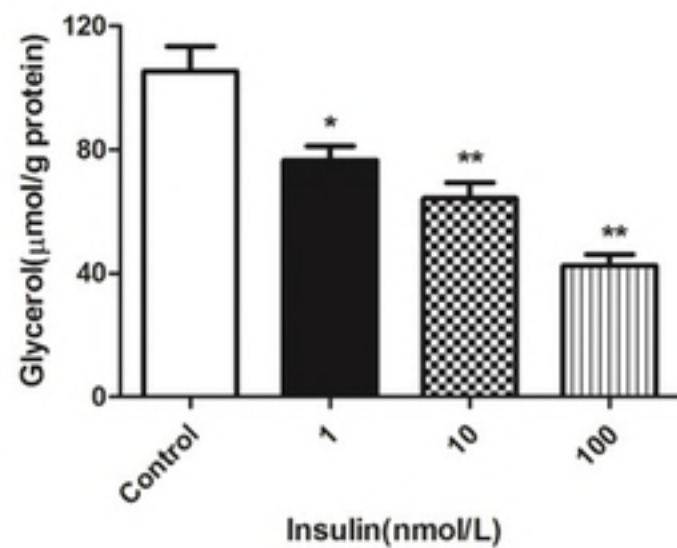

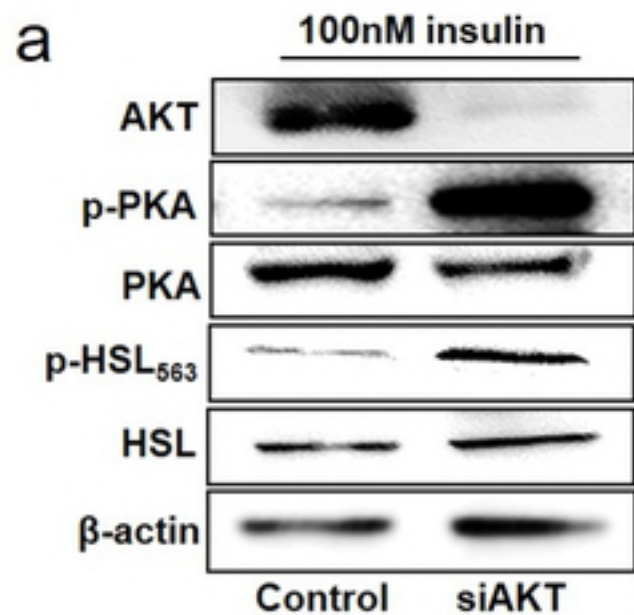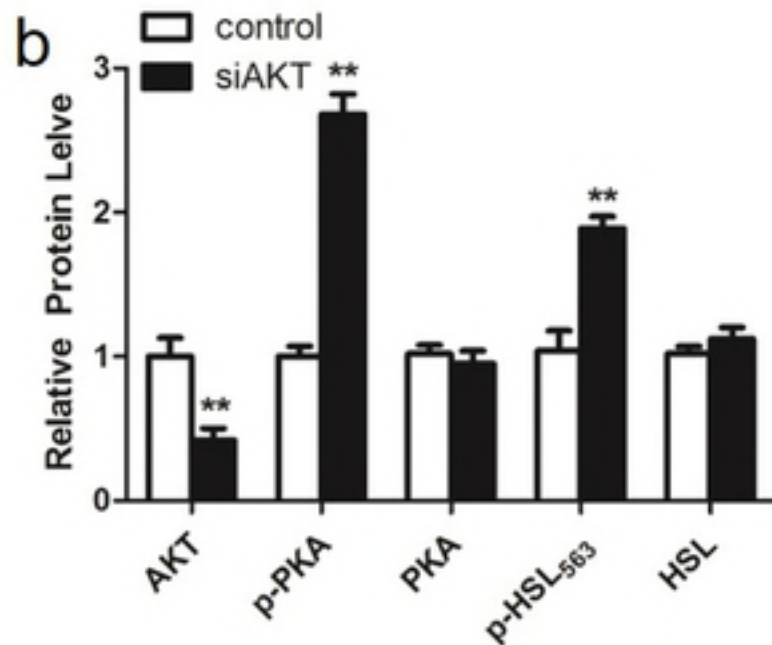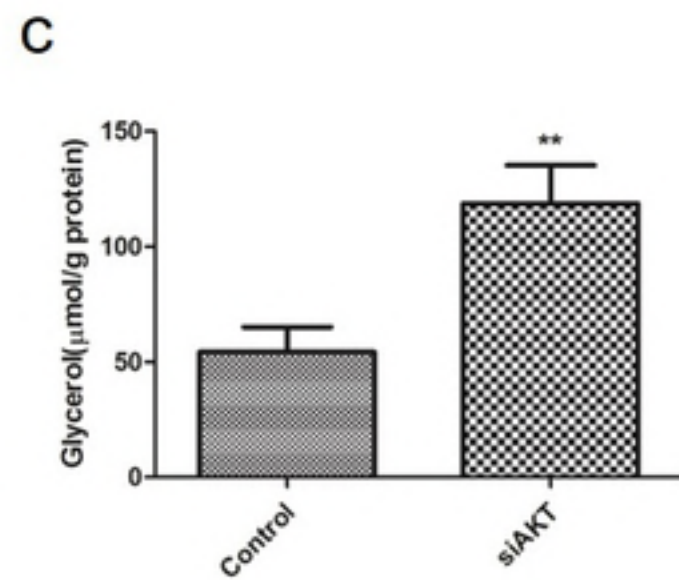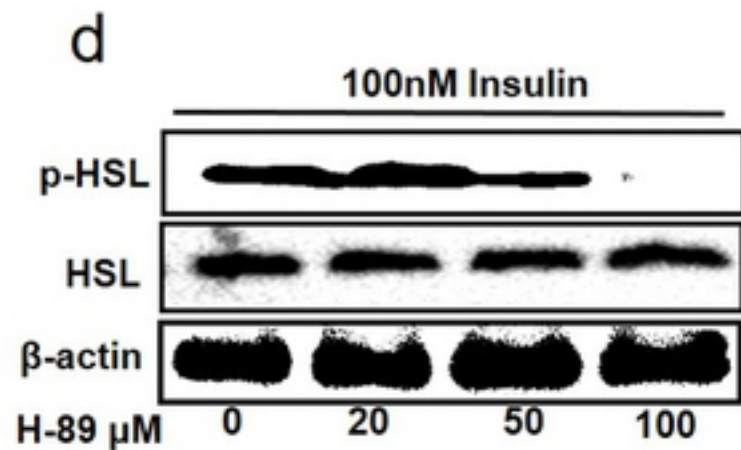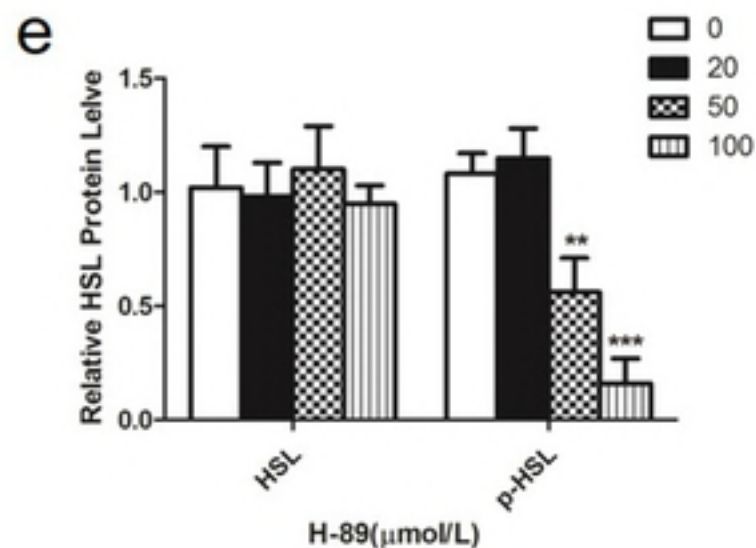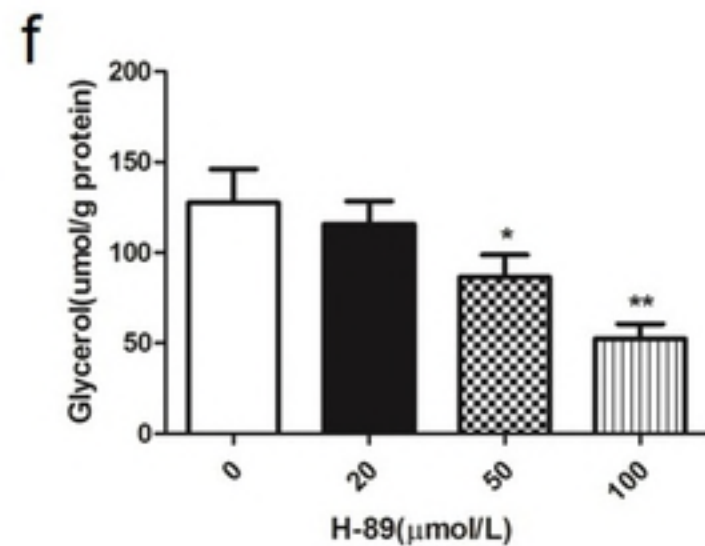

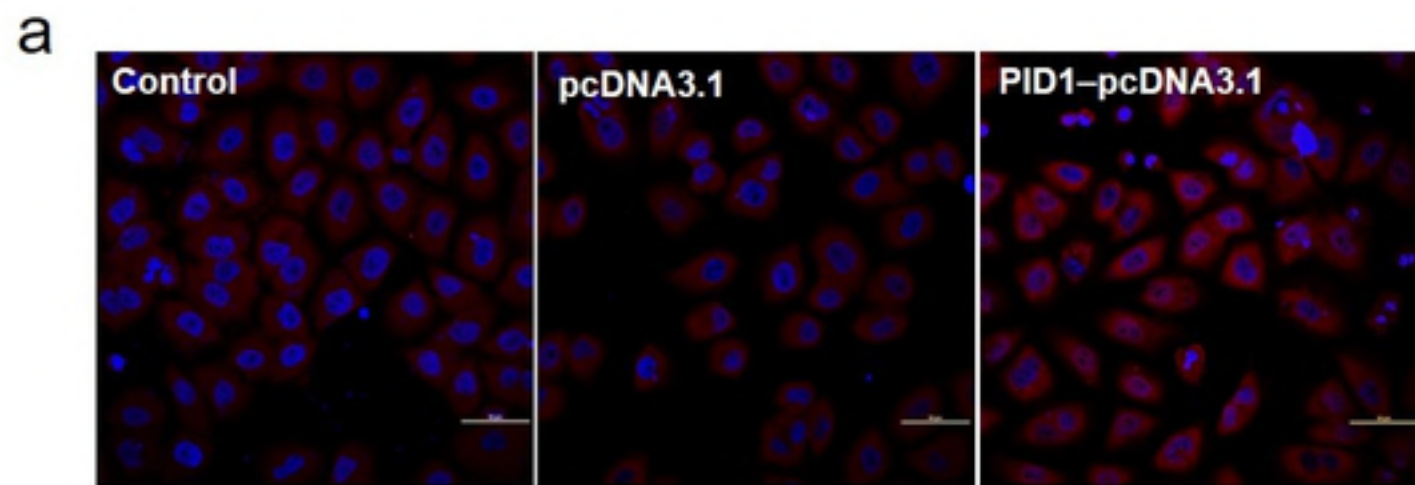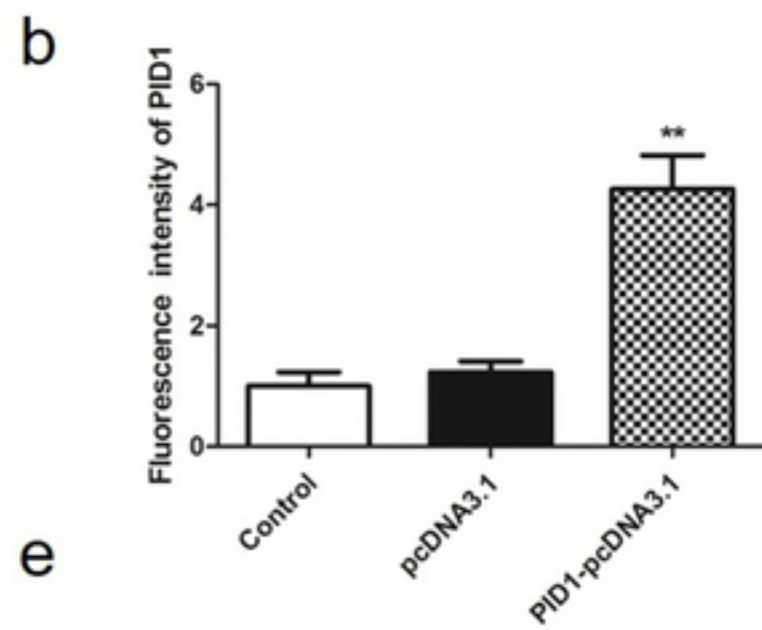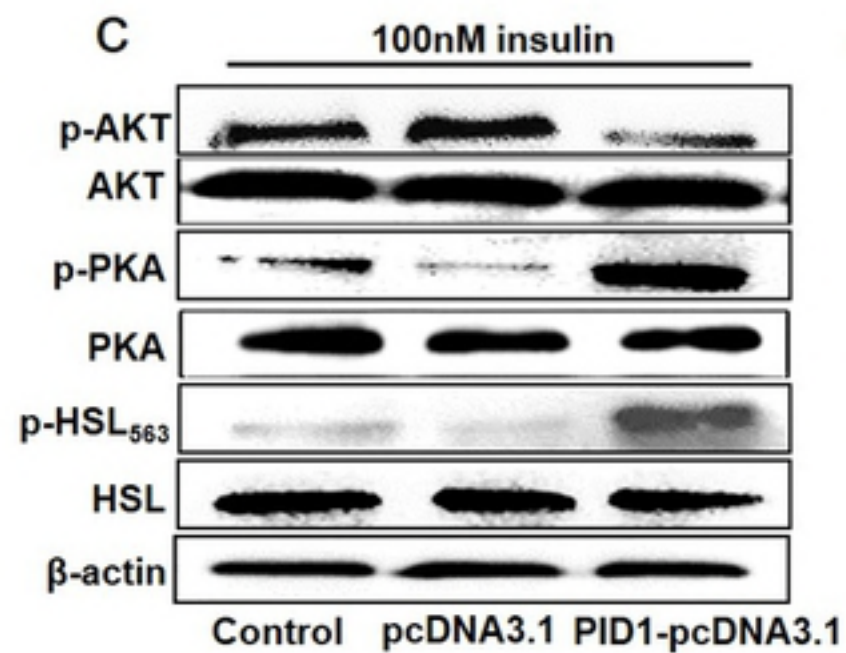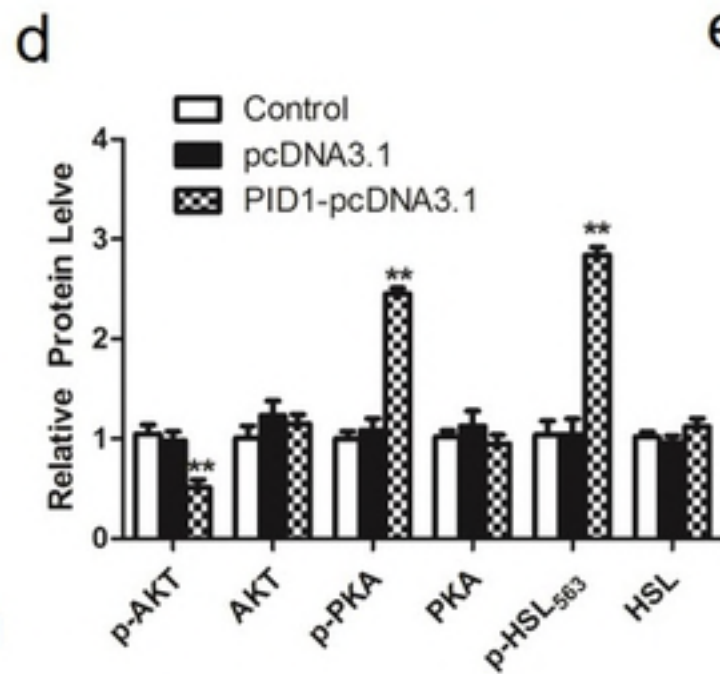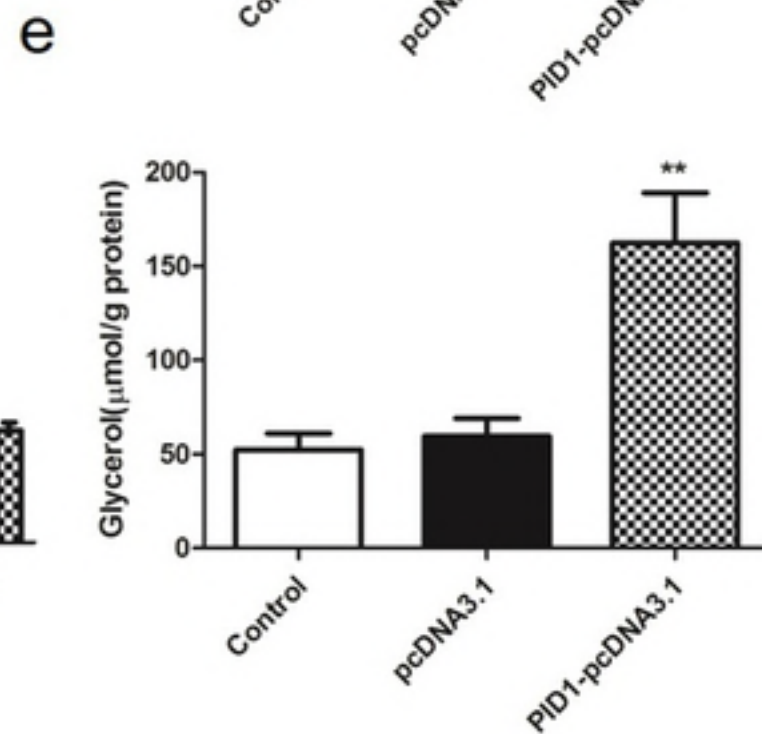

Source: https://www.biorxiv.org/content/10.1101/317024v1.full.pdf
